# Supplementary material for: Association of chronotype with language and episodic memory processing in children: Implications for brain structure
Source: Research Square preprint supplement (doi:10.21203/rs.3.rs-3971512/v1), 2024-03-28
Supplement: Supplementary file 1 [file 77514e69c2734e9eef90a8a5.docx]

**Association of chronotype with language and episodic memory processing in children: Implications for brain structure**

Masatoshi Yamashita, Qiulu Shou, and Yoshifumi Mizuno

**Supplementary Materials**

**National Institutes of Health Toolbox Tasks**

In the flanker inhibitory control and attention task, participants were instructed to indicate the left-right orientation of a central arrow flanked by two arrows pointing in the same (congruent) or different (incongruent) direction. In the pattern comparison processing speed task, participants were instructed to use their dominant hand to tap “yes” if the stimuli presented on the screen were the same and “no” if they were not. In the picture sequence memory task, images and verbal statements of events (e.g., “going to the park”) were presented sequentially and assigned corresponding positions on the screen. Subsequently, images were presented scrambled in the screen center and participants were instructed to replicate the sequence by dragging the images to their appropriate positions. In the picture vocabulary task, participants were instructed to select an image from a set of four that corresponded to a read-out word. In the oral reading recognition task, participants were instructed to read out words that were presented on the screen.

**Supplementary Tables**

**Supplementary Table 1.** Variables used in this study

| Variable | Data file |
| --- | --- |
| NIH Toolbox: flanker inhibitory control and attention | abcd_tbss01 |
| NIH Toolbox: pattern comparison processing speed |
| NIH Toolbox: picture sequence memory |
| NIH Toolbox: picture vocabulary |
| NIH Toolbox: oral reading recognition |
| Gray matter volume for 34 cortical regions (Desikan atlas-based classification; 68 regions in total) | abcd_smrip101 |
| Gray matter volume for 7 subcortical regions (atlas-based classification; 14 regions in total), Intracranial volume | abcd_smrip201 |
| Handedness | abcd_ehis01 |
| Chronotype | abcd_mcqc01 |
| FreeSurfer quality control | abcd_imgincl01 |
| Site ID | abcd_lt01 |
| MRI scanner number | abcd_mri01 |
| Medication use | medsy01 |
| Race/ethnicity, sibling status, twin or triplet status | acspsw03 |
| Home environment (education and income) | pdem02 |
| Pubertal status | abcd_ppdms01 (parent/guardian)  abcd_ypdms01(participants) |

MRI, magnetic resonance imaging.

**Supplementary Table 2.** Summary of language-related and episodic memory-related area

| Brain region |
| --- |
| Language-related areas (bilateral 24 regions) |
| Caudal middle frontal, Fusiform, Precentral, Inferior temporal, Middle temporal, Lateral occipital, Rostral middle frontal, Superior parietal, Superior temporal, Superior frontal, Supramarginal, Insula |
|  |
| Episodic memory-related areas (bilateral 14 regions) |
| Entorhinal, Parahippocampal, Posterior cingulate, Precuneus, inferior parietal, lateral orbitofrontal, Hippocampus |

**Supplementary Table 3.** Brain structural characteristics associated with chronotype

| Brain region | Standardized coefficient (*β*) | 95% CI | *R*2 | *t* | FDR-*P* |
| --- | --- | --- | --- | --- | --- |
| Language-related area | |  |  |  |  |
| L caudal middle frontal | -0.02 | -0.05, 0.02 | 0.30 | 1.00 | 0.638 |
| R caudal middle frontal | -0.002 | -0.03, 0.03 | 0.30 | 0.12 | 0.969 |
| L fusiform | -0.02 | -0.05, 0.01 | 0.38 | 1.24 | 0.484 |
| R fusiform | -0.01 | -0.04, 0.02 | 0.47 | 0.76 | 0.703 |
| L inferior temporal | -0.01 | -0.04, 0.01 | 0.42 | 0.96 | 0.638 |
| R inferior temporal | -0.008 | -0.36, 0.02 | 0.43 | 0.59 | 0.749 |
| L lateral occipital | -0.001 | -0.03, 0.03 | 0.43 | 0.097 | 0.969 |
| R lateral occipital | -0.008 | -0.03, 0.02 | 0.45 | 0.60 | 0.749 |
| L middle temporal | -0.004 | -0.03, 0.02 | 0.44 | 0.29 | 0.905 |
| R middle temporal | -0.02 | -0.04, 0.009 | 0.51 | 1.29 | 0.484 |
| R precentral | -0.02 | -0.04, 0.01 | 0.46 | 1.15 | 0.530 |
| L rostral middle frontal | -0.02 | -0.04, 0.009 | 0.49 | 1.28 | 0.484 |
| R rostral middle frontal | -0.03 | -0.06, -0.003 | 0.45 | 2.18 | 0.240 |
| L superior frontal | -0.02 | -0.04, 0.003 | 0.53 | 1.69 | 0.382 |
| R superior frontal | -0.02 | -0.04, 0.009 | 0.50 | 1.24 | 0.484 |
| L superior parietal | -0.03 | -0.06, -0.001 | 0.40 | 2.04 | 0.262 |
| L superior temporal | -0.02 | -0.05, 0.002 | 0.48 | 1.85 | 0.308 |
| R superior temporal | 0.01 | -0.02, 0.04 | 0.46 | 0.75 | 0.703 |
| L supramarginal | -0.0005 | -0.03, 0.03 | 0.46 | 0.04 | 0.972 |
| R supramarginal | -0.02 | -0.05, 0.007 | 0.38 | 1.46 | 0.461 |
| L insula | -0.0009 | -0.02, 0.03 | 0.48 | 0.07 | 0.969 |
| R insula | -0.007 | -0.03, 0.02 | 0.49 | 0.57 | 0.749 |
| Episodic memory-related area | |  |  |  |  |
| L entorhinal | -0.01 | -0.04, 0.02 | 0.20 | 0.80 | 0.703 |
| R entorhinal | -0.02 | -0.06, 0.009 | 0.16 | 1.45 | 0.461 |
| L lateral orbitofrontal | -0.03 | -0.05, -0.002 | 0.50 | 2.15 | 0.240 |
| R lateral orbitofrontal | -0.02 | -0.05, 0.006 | 0.38 | 1.52 | 0.461 |
| L inferior parietal | -0.004 | -0.03, 0.02 | 0.38 | 0.27 | 0.905 |
| R inferior parietal | -0.002 | -0.03, 0.02 | 0.44 | 0.16 | 0.969 |
| L parahippocampal | -0.02 | -0.05, 0.009 | 0.26 | 1.41 | 0.461 |
| R parahippocampal | -0.03 | -0.06, 0.0008 | 0.32 | 1.91 | 0.305 |
| L posterior cingulate | -0.005 | -0.04, 0.02 | 0.32 | 0.36 | 0.905 |
| L precuneus | -0.009 | -0.03, 0.02 | 0.49 | 0.66 | 0.745 |
| R precuneus | -0.004 | -0.03, 0.02 | 0.51 | 0.28 | 0.905 |
| L hippocampus | -0.01 | -0.04, 0.02 | 0.36 | 0.73 | 0.703 |
| R hippocampus | -0.01 | -0.04, 0.01 | 0.41 | 0.92 | 0.650 |

CI, confidence interval; FDR, false discovery rate; L, left; R, right.
